# Supplementary material for: Evaluation of multiple approaches to identify genome-wide polymorphisms in closely related genotypes of sweet cherry (Prunus avium L.)
Source: PubMed Central journal article supplement (PMC5376269; doi:10.1016/j.csbj.2017.03.002), 2017-03-18
Supplement: mmc3.pdf [file mmc3.pdf]

| NCBI SS#    | Original Full Name in 6K SNP Array     | SNP Sequence (NCBI)                                        | Sequence (BLAST sequence, Bing)                      | Predicted SNP | Actual SNP | Chromosome | Physical position (bp) | Estimated genetic position #1 (cM) | Estimated genetic position #2 (cM) |
|-------------|----------------------------------------|------------------------------------------------------------|------------------------------------------------------|---------------|------------|------------|------------------------|------------------------------------|------------------------------------|
| ss490545369 | RosBREED_snp_sweet_cherry_Pp1_00094685 | TTCAGTAGAGCTCCCTGGGGCTTGC [A/C] AAGTTTGCAAACTCAATCAACTTG   | TTCAGTAGAGCTCCCTGGGGCTTGC AAGTTTGCAAACTCAATCAACTTG   | C             | C          | 1          | 94685                  | 0.21                               | 0.00                               |
| ss490545372 | RosBREED_snp_sweet_cherry_Pp1_00114487 | AACAACCTACCATAACAGACCTTCGA [C/T] GATAGTATACAACAACGAAACCAC  | AACAACCTACCATAACAGACCTTCGATGATAGTATACAACAACGAAACCAC  | A             | A          | 1          | 114487                 | 0.26                               | 0.00                               |
| ss490545375 | RosBREED_snp_sweet_cherry_Pp1_00154827 | TTGCTTTGTAGACCTTGTCCATCTA [C/T] CTGTAGTTTCTTCTTTTCATTA     | TTGCTTTGTAGACCTTGTCCATCTA CTGTAGTTTCTTCTTTTCATTA     | A             | A          | 1          | 154827                 | 0.35                               | 0.00                               |
| ss490545378 | RosBREED_snp_sweet_cherry_Pp1_00196391 | TTTGGAAATGTTCTTGTCCAATTGA [G/T] CTCTCAGCTTTGGCAGTAGTTCTC   | TTTGGAAATGTTCTTGTCCAATTGA CTCTCAGCTTTGGCAGTAGTTCTC   | A             | A          | 1          | 196391                 | 0.44                               | 0.00                               |
| ss490548745 | RosBREED_snp_sweet_cherry_Pp2_00911589 | ACACCCATACCCAAGTTCTCCGTC [A/G] GAAGATGATGATGGTCTAAGAATA    | ACACCCATACCCAAGTTCTCCGTC GAAGATGATGATGGTCTAAGAATA    | G             | G          | 2          | 911589                 | 1.94                               | 0.00                               |
| ss490548749 | RosBREED_snp_sweet_cherry_Pp2_00979200 | AAGACGGATAGCCAGGGTGAAAAA [A/C] CTTGCCAAGTAACTAATAATAGCA    | AAGACGGATAGCCAGGGTGAAAAA CTTGCCAAGTAACTAATAATAGCA    | C             | C          | 2          | 979200                 | 2.08                               | 0.00                               |
| ss490548753 | RosBREED_snp_sweet_cherry_Pp2_01029506 | GGTTTGTAAAGGATGGTATACCTTA [C/T] TGGGAAAAGCAATTCTGCACCTTTGG | GGTTTGTAAAGGATGGTATACCTTA TGGGAAAAGCAATTCTGCACCTTTGG | A             | A          | 2          | 1029506                | 2.19                               | 0.00                               |
| ss490548757 | RosBREED_snp_sweet_cherry_Pp2_01123211 | TGTGTTTAAACAACCTTGTCCCTTGA [A/C] AGTTTAACTGGGCAACAATACTG   | TGTGTTTAAACAACCTTGTCCCTTGA AACTGGGCAACAATACTG        | C             | C          | 2          | 1123211                | 2.39                               | 0.00                               |
| ss490552278 | RosBREED_snp_sweet_cherry_Pp4_00355217 | TAACCTCTTGCATCTTGAGGAAAAC [A/G] GGTGGTGGTAACCTAATCTCGCTGC  | TAACCTCTTGCATCTTGAGGAAAAC GGTGGTGGTAACCTAATCTCGCTGC  | G             | G          | 4          | 355217                 | 2.47                               | 0.92                               |
| ss490552281 | RosBREED_snp_sweet_cherry_Pp4_00394639 | TTATTGGGCCAGAATCTGAGCTGAG [A/G] CGAGACGAGACTTGCCATATGGTTCA | TTATTGGGCCAGAATCTGAGCTGAG CGAGACGAGACTTGCCATATGGTTCA | C             | C          | 4          | 394639                 | 2.58                               | 1.07                               |
| ss490552284 | RosBREED_snp_sweet_cherry_Pp4_00430644 | CTGCAAAAACAACACAGCTCCGTGAA [G/T] ACATAAACACGACATCCAAATGC   | CTGCAAAAACAACACAGCTCCGTGAA ACATAAACACGACATCCAAATGC   | A             | A          | 4          | 430644                 | 2.69                               | 1.19                               |
| ss490552287 | RosBREED_snp_sweet_cherry_Pp4_00473163 | TCATCGGATTGGATTACCTCTCGTT [C/T] GAGTCTGAGGTGAAGTTTATAGCC   | TCATCGGATTGGATTACCTCTCGTT GAGTCTGAGGTGAAGTTTATAGCC   | A             | A          | 4          | 473163                 | 2.81                               | 1.35                               |
| ss49055002  | RosBREED_snp_sweet_cherry_Pp6_00940675 | TTCTTTACTCAGTCTTGTGCTACTG [A/C] AAAGTTCATCCGACTCTTGGTGAC   | TTCTTTACTCAGTCTTGTGCTACTG AAAGTTCATCCGACTCTTGGTGAC   | C             | C          | 6          | 940675                 | 9.34                               | 0.00                               |
| ss49055005  | RosBREED_snp_sweet_cherry_Pp6_00981908 | GATAAGTGCTGGTGGGTTTACAT [A/G] TCATAATATACCTGGTCTGTTTCTGT   | GATAAGTGCTGGTGGGTTTACAT TCATAATATACCTGGTCTGTTTCTGT   | C             | C          | 6          | 981908                 | 9.40                               | 0.00                               |
| ss49055008  | RosBREED_snp_sweet_cherry_Pp6_01023194 | GGTCTATTGATTCTGAAAATGCTGC [A/G] AATGGTCAGATCCAATCTGAGCGCT  | GGTCTATTGATTCTGAAAATGCTGC AATGGTCAGATCCAATCTGAGCGCT  | G             | G          | 6          | 1023194                | 9.46                               | 0.00                               |
| ss49055011  | RosBREED_snp_sweet_cherry_Pp6_01062002 | ATAGGCAACATTAATAATTTAAT [A/G] GGAGGCTGTTAATCTTCAATGCT      | ATAGGCAACATTAATAATTTAAT GGAGGCTGTTAATCTTCAATGCT      | G             | G          | 6          | 1062002                | 9.51                               | 0.00                               |
| ss490558164 | RosBREED_snp_sweet_cherry_Pp8_13263864 | TCTGGAAGAAGTGAAGGAATTCAC [A/G] GGTTCAAATCCAAGAGCGGGTTGA    | TCTGGAAGAAGTGAAGGAATTCAC GGTTCAAATCCAAGAGCGGGTTGA    | G             | G          | 8          | 13263864               | 24.29                              | 35.79                              |
| ss490558167 | RosBREED_snp_sweet_cherry_Pp8_13297952 | TACTAGTTTCTTCTTTCTTTGGTC [A/G] GCATCTCCTTGCAATCCTTATAGT    | TACTAGTTTCTTCTTTCTTTGGTC GCATCTCCTTGCAATCCTTATAGT    | G             | G          | 8          | 13297952               | 24.33                              | 35.95                              |
| ss490558170 | RosBREED_snp_sweet_cherry_Pp8_13376142 | ATCTTTGGTGTCTTACCATTGGAC [A/G] TGGAGAGGCTCTTCTCTCTCTCT     | ATCTTTGGTGTCTTACCATTGGAC TGGAGAGGCTCTTCTCTCTCTCTCT   | G             | G          | 8          | 13376142               | 24.43                              | 36.31                              |
| ss490558173 | RosBREED_snp_sweet_cherry_Pp8_13397168 | TTGCAATCACTCTAATGCTTCTACT [A/C] TTCTTGCAGATGGCCTGATCTGGA   | TTGCAATCACTCTAATGCTTCTACT TTCTTGCAGATGGCCTGATCTGGA   | C             | C          | 8          | 13397168               | 24.46                              | 36.41                              |
