# Supplementary material for: Evaluation of multiple approaches to identify genome-wide polymorphisms in closely related genotypes of sweet cherry (Prunus avium L.)
Source: PubMed Central journal article supplement (PMC5376269; doi:10.1016/j.csbj.2017.03.002), 2017-03-18
Supplement: mmc6.pdf [file mmc6.pdf]

|                            | 8_45     | 14_34    | 18_120   | 20_10    | 21_66    | 23_5     | 24_46    | 34_37    | 35_109   | 40_4     | 43_86    | 47_111   | 48_35    | 51_9     | 54_1     | 55_93    |
|----------------------------|----------|----------|----------|----------|----------|----------|----------|----------|----------|----------|----------|----------|----------|----------|----------|----------|
| Bing_NoIndex_L006_R1_001.1 | 1        | 1        | 4        | 0        | 4        | 2        | 0        | 4        | 0        | 4        | 2        | 0        | 0        | 2        | 3        | 3        |
| Bing_NoIndex_L006_R1_001.1 | 3        | 3        | 4        | 0        | 4        | 4        | 0        | 4        | 0        | 4        | 4        | 0        | 0        | 4        | 4        | 4        |
| Bing_NoIndex_L006_R2_001.2 | 0        | 1        | 4        | 0        | 4        | 0        | 1        | 0        | 1        | 0        | 0        | 0        | 1        | 0        | 3        | 4        |
| Bing_NoIndex_L006_R2_001.2 | 0        | 3        | 4        | 0        | 4        | 0        | 3        | 0        | 4        | 0        | 0        | 0        | 4        | 0        | 4        | 4        |
| Bing_NoIndex_L007_R2_002.2 | 0        | 0        | 4        | 1        | 2        | 0        | 1        | 4        | 0        | 0        | 0        | 0        | 4        | 0        | 0        | 0        |
| Bing_NoIndex_L007_R2_002.2 | 0        | 0        | 4        | 1        | 4        | 0        | 1        | 4        | 0        | 0        | 0        | 0        | 4        | 0        | 0        | 0        |
| Bing_NoIndex_L007_R1_002.1 | 0        | 1        | 0        | 0        | 0        | 0        | 1        | 4        | 1        | 0        | 4        | 2        | 0        | 0        | 3        | 0        |
| Bing_NoIndex_L007_R1_002.1 | 0        | 3        | 0        | 0        | 0        | 0        | 3        | 4        | 4        | 0        | 4        | 4        | 0        | 0        | 4        | 0        |
| <b>Bing</b>                | <b>1</b> | <b>1</b> | <b>4</b> | <b>1</b> | <b>4</b> | <b>2</b> | <b>1</b> | <b>4</b> | <b>1</b> | <b>4</b> | <b>2</b> | <b>2</b> | <b>1</b> | <b>2</b> | <b>3</b> | <b>3</b> |
| <b>Bing</b>                | <b>3</b> | <b>3</b> | <b>4</b> | <b>1</b> | <b>4</b> | <b>4</b> | <b>3</b> | <b>4</b> | <b>4</b> | <b>4</b> | <b>4</b> | <b>4</b> | <b>4</b> | <b>4</b> | <b>4</b> | <b>4</b> |
| Glory_NoIndex_L006_R1_001. | 1        | 0        | 4        | 0        | 2        | 4        | 1        | 0        | 1        | 0        | 0        | 0        | 0        | 0        | 4        | 0        |
| Glory_NoIndex_L006_R1_001. | 3        | 0        | 4        | 0        | 4        | 4        | 3        | 0        | 4        | 0        | 0        | 0        | 0        | 0        | 4        | 0        |
| Glory_NoIndex_L006_R2_001. | 0        | 0        | 4        | 0        | 4        | 4        | 1        | 4        | 1        | 0        | 0        | 0        | 1        | 0        | 3        | 0        |
| Glory_NoIndex_L006_R2_001. | 0        | 0        | 4        | 0        | 4        | 4        | 1        | 4        | 4        | 0        | 0        | 0        | 4        | 0        | 4        | 0        |
| Glory_NoIndex_L007_R1_002. | 0        | 3        | 0        | 0        | 4        | 4        | 0        | 2        | 4        | 0        | 0        | 0        | 1        | 0        | 0        | 0        |
| Glory_NoIndex_L007_R1_002. | 0        | 3        | 0        | 0        | 4        | 4        | 0        | 4        | 4        | 0        | 0        | 0        | 4        | 0        | 0        | 0        |
| Glory_NoIndex_L007_R2_002. | 0        | 1        | 0        | 0        | 2        | 0        | 0        | 2        | 0        | 0        | 0        | 2        | 1        | 0        | 3        | 0        |
| Glory_NoIndex_L007_R2_002. | 0        | 3        | 0        | 0        | 4        | 0        | 0        | 4        | 0        | 0        | 0        | 2        | 4        | 0        | 4        | 0        |
| <b>Glory</b>               | <b>1</b> | <b>3</b> | <b>4</b> | <b>0</b> | <b>2</b> | <b>4</b> | <b>1</b> | <b>2</b> | <b>1</b> | <b>0</b> | <b>0</b> | <b>2</b> | <b>1</b> | <b>0</b> | <b>3</b> | <b>0</b> |
| <b>Glory</b>               | <b>3</b> | <b>3</b> | <b>4</b> | <b>0</b> | <b>4</b> | <b>4</b> | <b>3</b> | <b>4</b> | <b>4</b> | <b>0</b> | <b>0</b> | <b>2</b> | <b>4</b> | <b>0</b> | <b>4</b> | <b>0</b> |
| Kimberly_NoIndex_L006_R1_0 | 0        | 1        | 0        | 1        | 0        | 0        | 1        | 4        | 4        | 0        | 0        | 0        | 1        | 0        | 0        | 0        |
| Kimberly_NoIndex_L006_R1_0 | 0        | 3        | 0        | 2        | 0        | 0        | 3        | 4        | 4        | 0        | 0        | 0        | 4        | 0        | 0        | 0        |
| Kimberly_NoIndex_L006_R2_0 | 0        | 1        | 0        | 1        | 2        | 4        | 1        | 4        | 0        | 0        | 0        | 0        | 0        | 0        | 0        | 4        |
| Kimberly_NoIndex_L006_R2_0 | 0        | 3        | 0        | 1        | 4        | 4        | 1        | 4        | 0        | 0        | 0        | 0        | 0        | 0        | 0        | 4        |
| Kimberly_NoIndex_L007_R1_0 | 1        | 0        | 0        | 0        | 0        | 0        | 1        | 4        | 4        | 0        | 2        | 0        | 0        | 0        | 0        | 0        |
| Kimberly_NoIndex_L007_R1_0 | 3        | 0        | 0        | 0        | 0        | 0        | 1        | 4        | 4        | 0        | 4        | 0        | 0        | 0        | 0        | 0        |
| Kimberly_NoIndex_L007_R2_0 | 1        | 0        | 4        | 0        | 4        | 4        | 1        | 4        | 1        | 0        | 0        | 0        | 4        | 0        | 0        | 0        |
| Kimberly_NoIndex_L007_R2_0 | 3        | 0        | 4        | 0        | 4        | 4        | 1        | 4        | 4        | 0        | 0        | 0        | 4        | 0        | 0        | 0        |
| <b>Kimberly</b>            | <b>1</b> | <b>1</b> | <b>4</b> | <b>1</b> | <b>2</b> | <b>4</b> | <b>1</b> | <b>4</b> | <b>4</b> | <b>0</b> | <b>2</b> | <b>0</b> | <b>1</b> | <b>0</b> | <b>0</b> | <b>4</b> |
| <b>Kimberly</b>            | <b>3</b> | <b>3</b> | <b>4</b> | <b>2</b> | <b>4</b> | <b>4</b> | <b>1</b> | <b>4</b> | <b>4</b> | <b>0</b> | <b>4</b> | <b>0</b> | <b>4</b> | <b>0</b> | <b>0</b> | <b>4</b> |
