# Supplementary material for: Evaluation of multiple approaches to identify genome-wide polymorphisms in closely related genotypes of sweet cherry (Prunus avium L.)
Source: PubMed Central journal article supplement (PMC5376269; doi:10.1016/j.csbj.2017.03.002), 2017-03-18

# Cluster Dendrogram

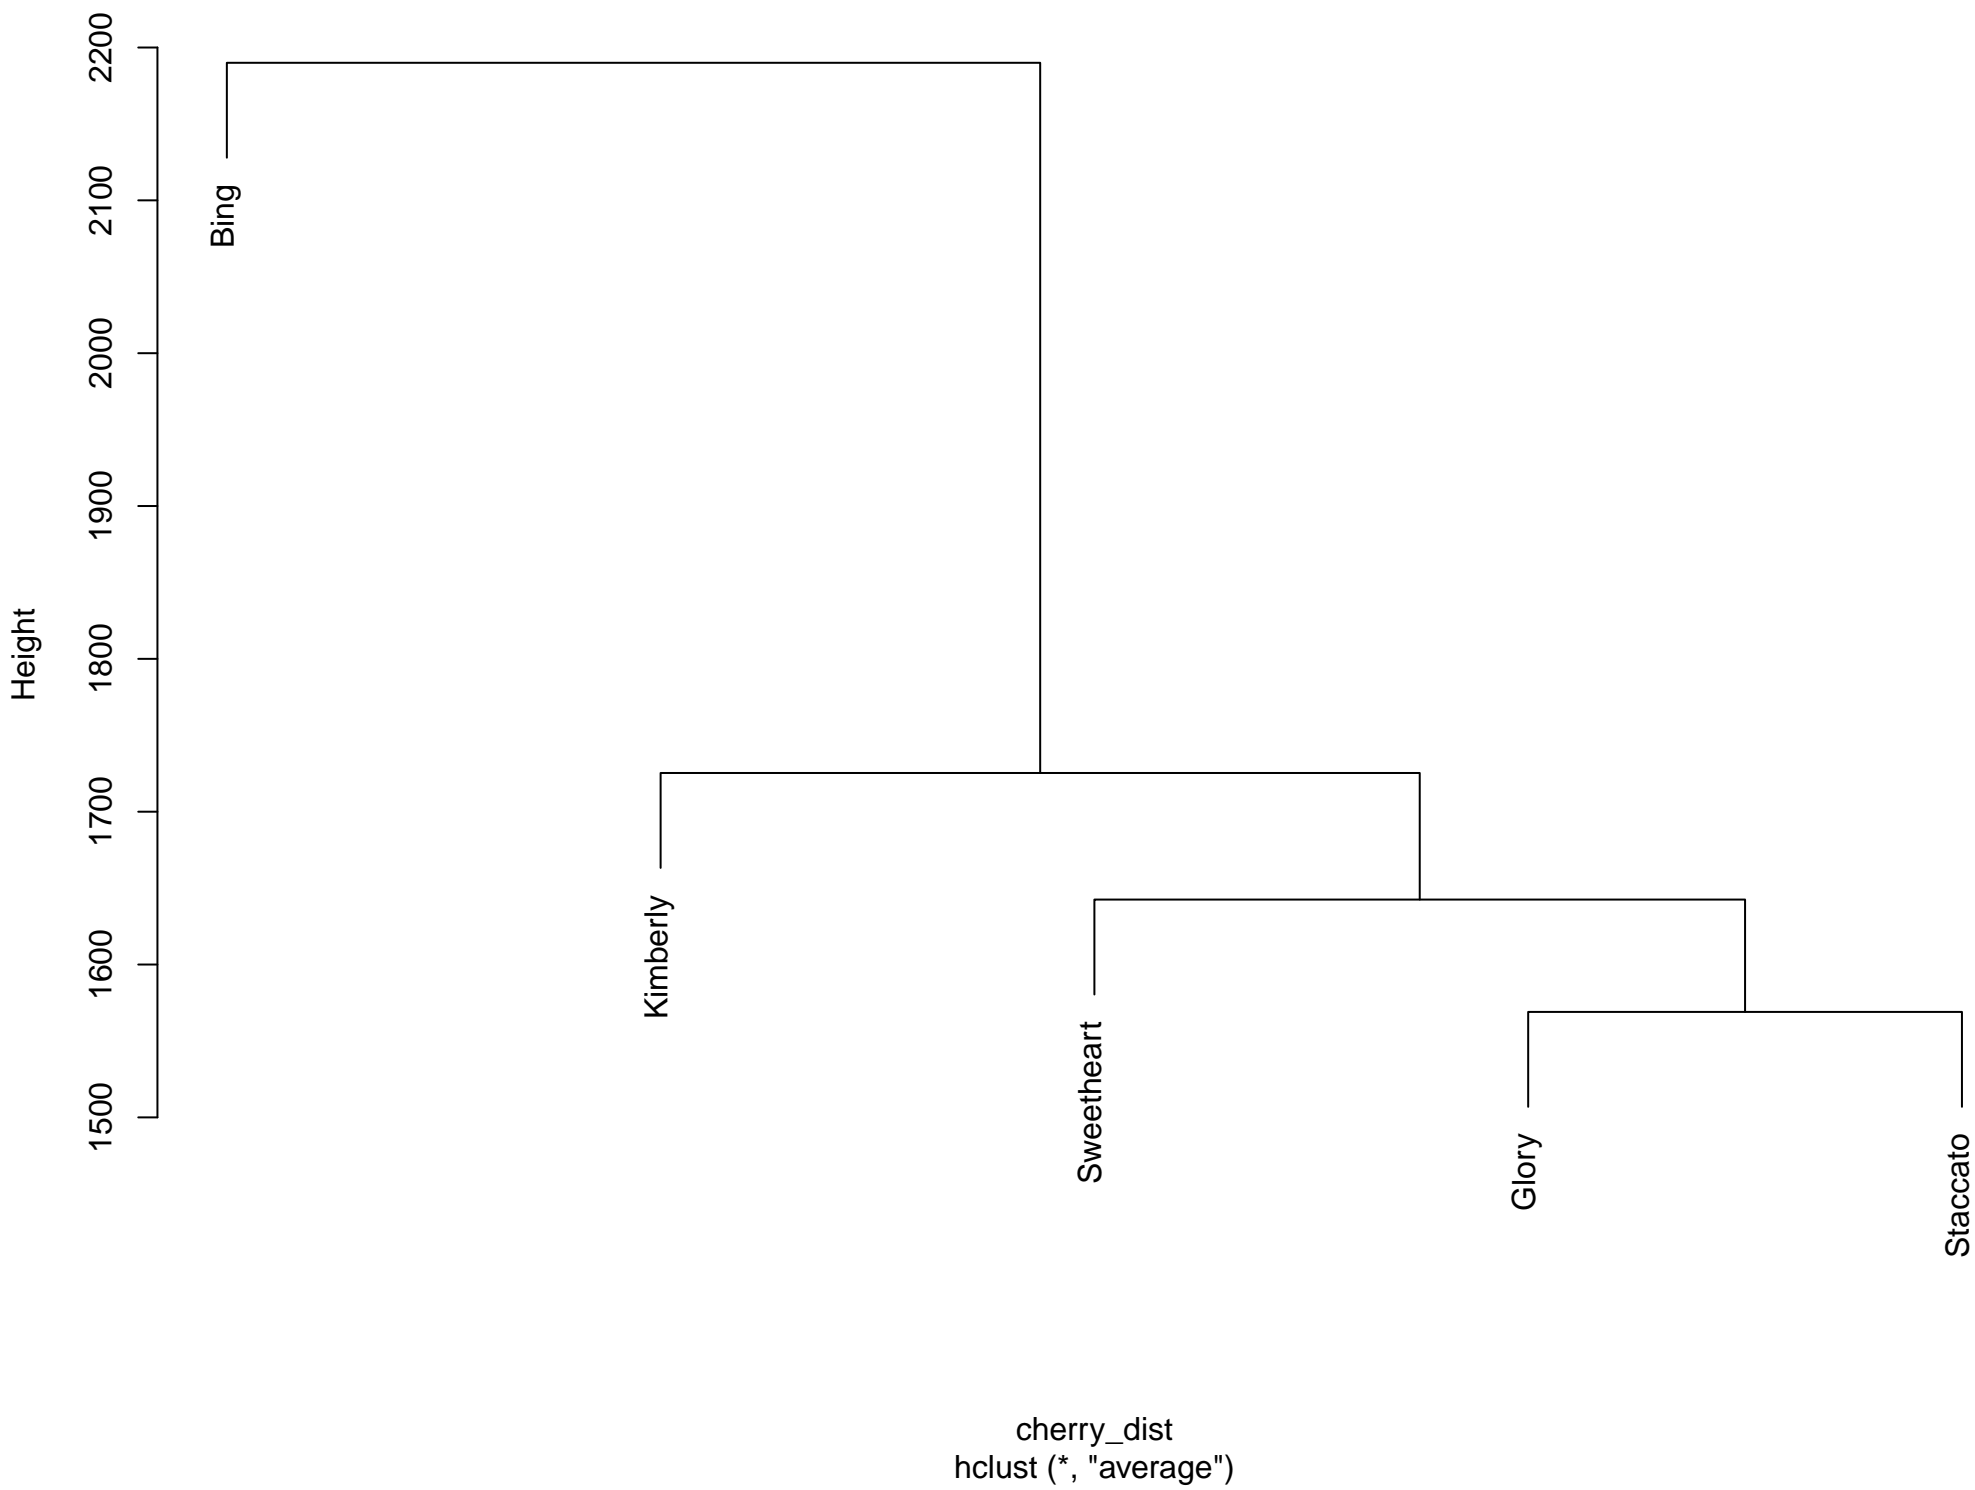

Supplement: mmc11.pdf [file mmc11.pdf]
